# Supplementary material
Source: PubMed Central journal article supplement (PMC1317965)
Supplement: pnas_0509276102_4.pdf [file pnas_0509276102_4.pdf]

Table 3: Thermodynamic quantities for each of the trajectories

| Quantities                  | Trajectory   |                  |                  |               |              |
|-----------------------------|--------------|------------------|------------------|---------------|--------------|
|                             | [RC]         | [P1]             | [P2]             | [DU]          | [RCS]        |
| Box size, Å                 |              |                  |                  |               |              |
| $L_X$                       | 41.81        | 42.88            | 43.01            | 41.73         | 41.09        |
| $L_Y$                       | 41.84        | 43.03            | 42.98            | 41.76         | 41.12        |
| $L_Z$                       | 41.84        | 42.96            | 43.00            | 41.79         | 41.12        |
| Water molecules             | 2,542        | 2,544            | 2,544            | 2,540         | 2,399        |
| No. of atoms                | 7,754        | 7,760            | 7,760            | 7,749         | 7,375        |
| Total mass, amu             | 46,764.1     | 46,800.1         | 46,800.1         | 46,705.1      | 45,648.9     |
| Volume, Å <sup>3</sup>      | 73,185.2     | 79,263.0         | 79,497.7         | 72,820.8      | 69,495.1     |
| Density, amu/Å <sup>3</sup> | 0.63898      | 0.59044          | 0.58870          | 0.64137       | 0.65686      |
| Density, g/cm <sup>3</sup>  | 1.06091      | 0.98031          | 0.97742          | 1.06487       | 1.09059      |
| Temperature, K              | 283.2 ± 2.6  | 283.2 ± 2.6      | 283.2 ± 2.6      | 283.2 ± 2.6   | 283.2 ± 2.7  |
| Pressure, bar               | -2.1 ± 220.4 | -1,420.7 ± 198.4 | -1,458.5 ± 198.2 | 111.6 ± 249.8 | 76.5 ± 230.2 |
