# Supplementary material
Source: PubMed Central journal article supplement (PMC1317965)
Supplement: pnas_0509276102_5.pdf [file pnas_0509276102_5.pdf]

Table 4: HB type and count per trajectory recorded during  $R^*(4,8)$  events. The three most important HBs in each trajectory are marked in bold.

| Hydrogen Bonds                                  | Trajectory   |              |              |            |              |
|-------------------------------------------------|--------------|--------------|--------------|------------|--------------|
|                                                 | [RC]         | [P1]         | [P2]         | [DU]       | [RCS]        |
| Glu-22(O $_{\epsilon}$ )–Lys-28(H $_{\zeta}$ )  | <b>1,833</b> | 1,595        | 0            | 0          | <b>4,740</b> |
| Asp-23(O $_{\delta}$ )–Lys-28(H $_{\zeta}$ )    | <b>1,590</b> | 3,311        | 72           | <b>253</b> | <b>5,106</b> |
| <b>SB</b>                                       | 33.3%        | 14.1%        | 1.0%         | 9.9%       | 68.7%        |
| Glu-22(O $_{\epsilon}$ )–Glu-22(H)              | 348          | 0            | 330          | 0          | 0            |
| Glu-22(O $_{\epsilon}$ )–Asp-23(H)              | 164          | 0            | 0            | 0          | 0            |
| Glu-22(O $_{\epsilon}$ )–Ser-26(H)              | 854          | 0            | 0            | 0          | 0            |
| Glu-22(O $_{\epsilon}$ )–Ser-26(H $_{\gamma}$ ) | 522          | 0            | 0            | 0          | 0            |
| Gln-22(O $_{\epsilon}$ )–Lys-28(H $_{\zeta}$ )  | 0            | 0            | 0            | 51         | 0            |
| Asp-23(O $_{\delta}$ )–Gln-22(H $_{\epsilon}$ ) | 0            | 0            | 0            | 164        | 0            |
| Asp-23(O $_{\delta}$ )–Val-24(H)                | 191          | 0            | 403          | 105        | 221          |
| Asp-23(O $_{\delta}$ )–Ser-26(H $_{\gamma}$ )   | 0            | 0            | <b>600</b>   | 0          | 0            |
| Asp-23(O $_{\delta}$ )–Ser-26(H)                | 0            | 0            | 274          | 0          | 0            |
| Asp-23(O $_{\delta}$ )–Gly-29(H)                | 0            | 0            | 0            | 0          | 257          |
| <b>Charged-SD</b>                               | 20.2%        | 0.0%         | 22.5%        | 12.5%      | 3.3%         |
| Ala-21(O)–Gly-25(H)                             | 0            | 0            | 227          | 0          | 0            |
| Ala-21(O)–Ser-26(H)                             | 0            | 2,078        | 0            | 0          | 0            |
| Glu-22(O)–Asn-27(H)                             | 0            | 2,977        | 0            | 0          | 0            |
| Glu-22(O)–Gly-29(H)                             | 0            | 0            | 0            | 0          | 447          |
| Asp-23(O)–Asn-27(H)                             | 0            | 412          | 209          | 0          | 0            |
| Asp-23(O)–Lys-28(H)                             | 36           | <b>8,252</b> | 182          | 245        | 0            |
| Val-24(O)–Lys-28(H)                             | 0            | 0            | 460          | 0          | 0            |
| Val-24(O)–Gly-29(H)                             | 57           | 0            | <b>1,713</b> | 0          | 0            |
| Asn-27(O)–Val-24(H)                             | 0            | 0            | 0            | 0          | <b>1,335</b> |
| Asn-27(O)–Gly-25(H)                             | 164          | 0            | 419          | 108        | 862          |
| Lys-28(O)–Val-24(H)                             | 0            | 0            | 0            | 43         | 118          |
| Lys-28(O)–Gly-25(H)                             | <b>4,430</b> | <b>8,098</b> | 0            | <b>796</b> | 548          |
| Gly-29(O)–Ser-26(H)                             | 0            | 0            | 0            | 97         | 96           |
| <b>Backbone HBs</b>                             | 45.6%        | 62.9%        | 45.0%        | 50.2%      | 23.8%        |
| Glu-22(O)–Asn-27(H $_{\delta}$ )                | 0            | 2,265        | 0            | 0          | 0            |
| Asp-23(O)–Asn-27(H $_{\delta}$ )                | 0            | 0            | 355          | 0          | 0            |
| Gly-25(O)–Gln-22(H $_{\epsilon}$ )              | 0            | 0            | 0            | 32         | 0            |
| Asn-27(O $_{\delta}$ )–Asp-23(H)                | 0            | 0            | 599          | 0          | 0            |
| <b>SD-Backbone</b>                              | 0%           | 6.5%         | 13.4%        | 1.2%       | 0.0%         |
| Val-24(O)–Ala-21(H $_{\tau}$ )                  | 83           | <b>4,633</b> | 212          | <b>385</b> | 169          |
| Gly-25(O)–Ala-21(H $_{\tau}$ )                  | 0            | 0            | 301          | 0          | 0            |
| Asn-27(O)–Ala-21(H $_{\tau}$ )                  | 0            | 0            | 131          | 0          | 0            |
| Ala-30(O $_{\tau}$ )–Ala-21(H $_{\tau}$ )       | 0            | 204          | 0            | 0          | 203          |
| Ala-30(O $_{\tau}$ )–Ser-26(H $_{\gamma}$ )     | 0            | 0            | 0            | 202        | 28           |
| Ala-30(O $_{\tau}$ )–Lys-28(H $_{\zeta}$ )      | 0            | 869          | <b>645</b>   | 85         | 192          |
| <b>N- C-terminal HBs</b>                        | 0.8%         | 16.4%        | 18.1%        | 26.2%      | 4.1%         |
