# Supplementary material
Source: PubMed Central journal article supplement (PMC1317965)

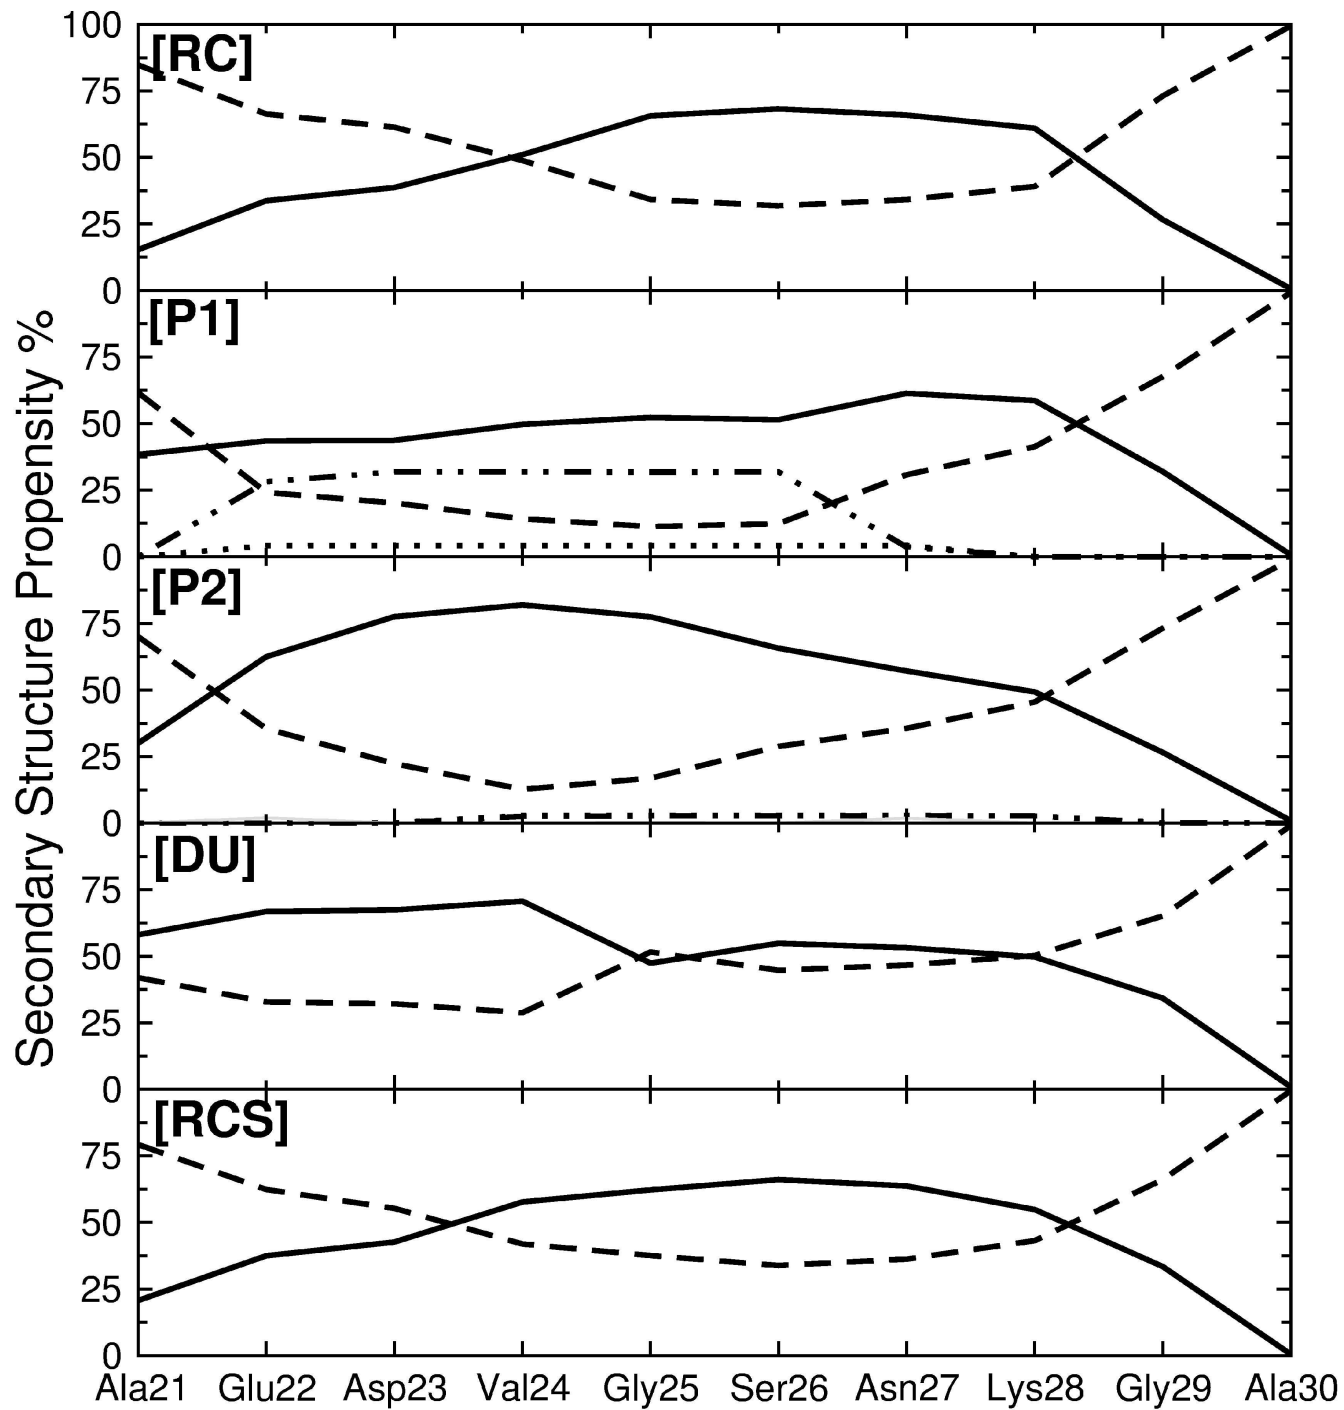

Supplement: pnas_0509276102_1.pdf [file pnas_0509276102_1.pdf]

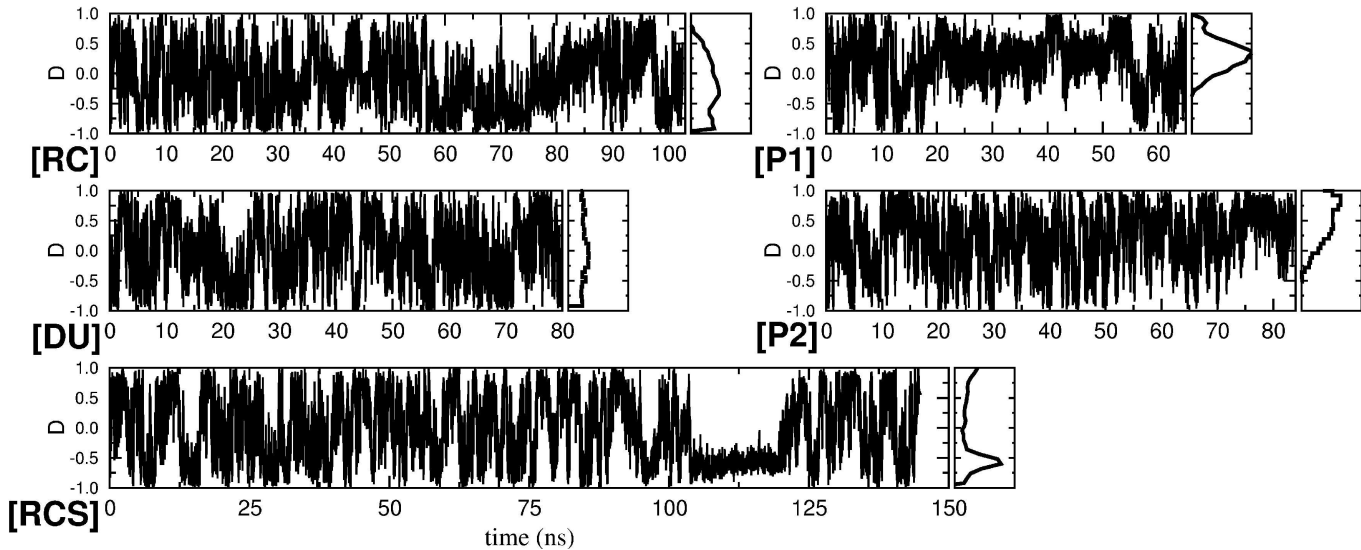

Supplement: pnas_0509276102_2.pdf [file pnas_0509276102_2.pdf]

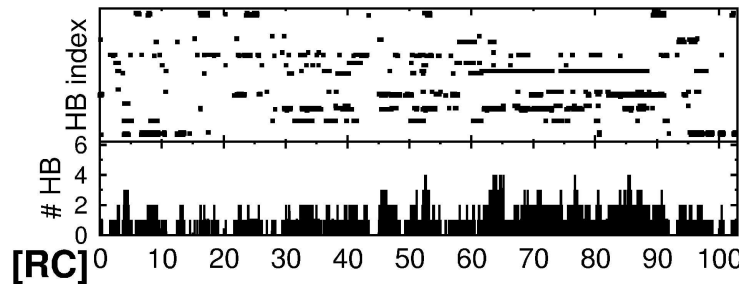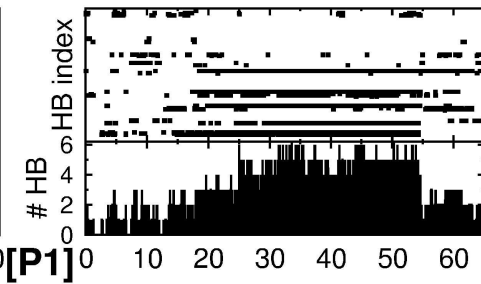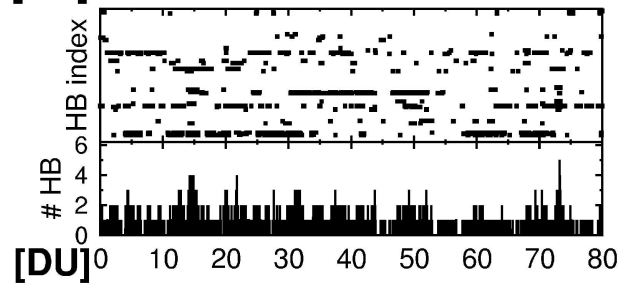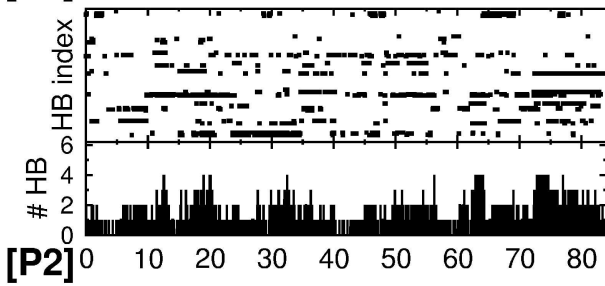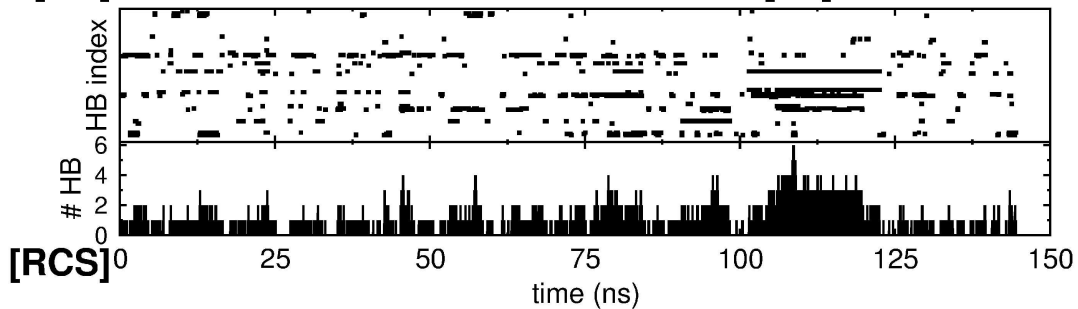

Supplement: pnas_0509276102_3.pdf [file pnas_0509276102_3.pdf]
